# Supplementary material for: In situ fabrication of hierarchical biomass carbon-supported Cu@CuO–Al2O3 composite materials: synthesis, properties and adsorption applications
Source: Royal Society of Chemistry journal article supplement (doi:10.1039/c9ra04385c), 2019-01-01
Supplement: c9ra04385c1.pdf [file c9ra04385c1.pdf]

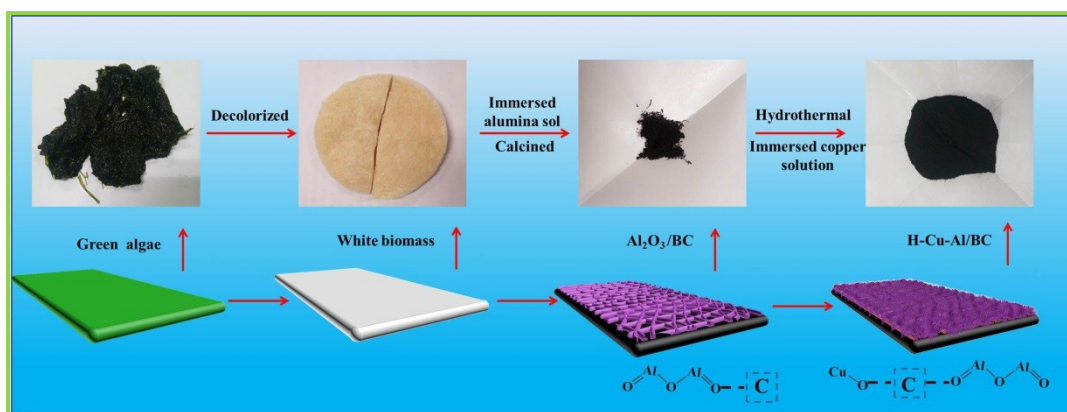

Scheme 1S. Scheme procedure of preparation process for H-Cu-Al/BC

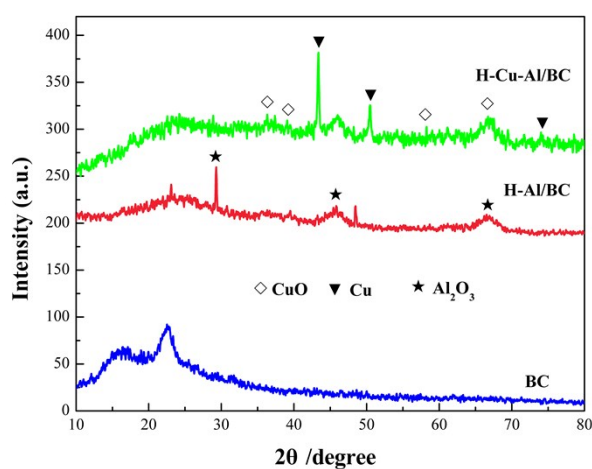

Fig. S1. X-ray diffraction of the prepared materials

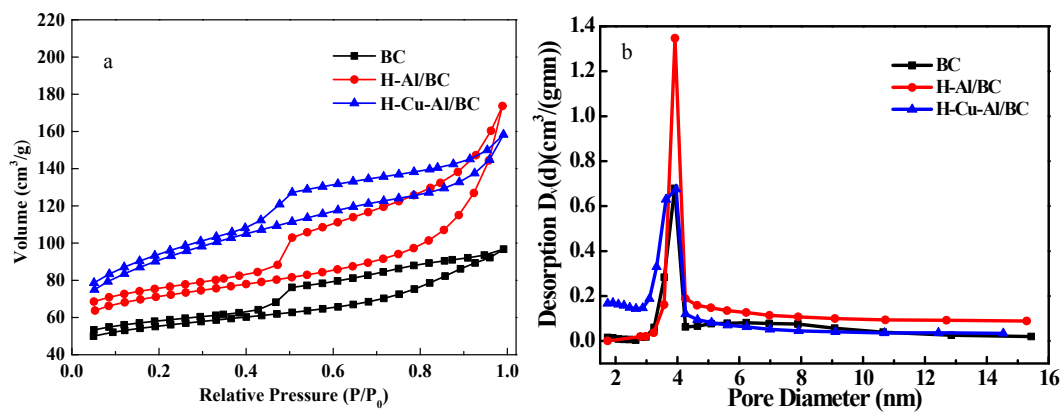

Fig.S2. N<sub>2</sub> sorption/desorption isotherms of three prepared samples (a. nitrogen adsorption/desorption isotherms; b. Pore size distributions by BJH method)

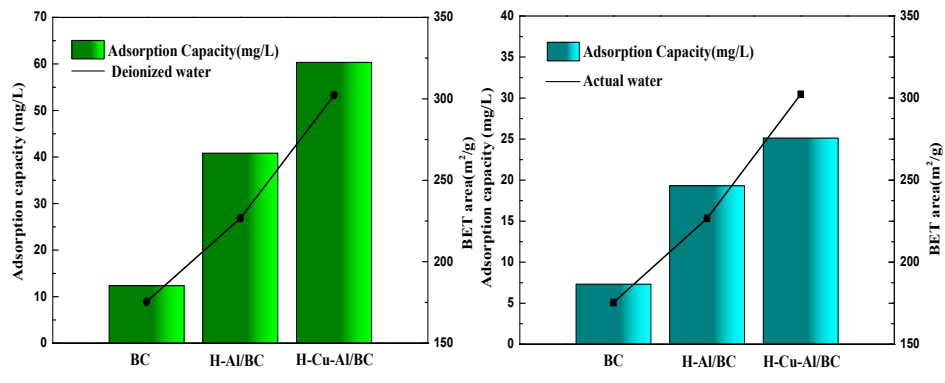

Fig.S3. The mutual relation of the adsorption capacity and BET areas under different water quality conditions

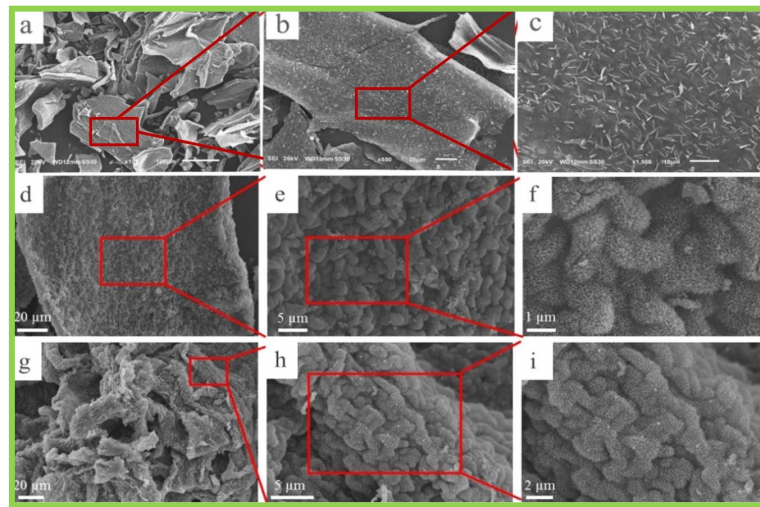

Fig. S4. SEM of BC (a, b, c), H-Al/BC (d, e, f) and H-Cu-Al/BC (g, h, i) at three different magnifications

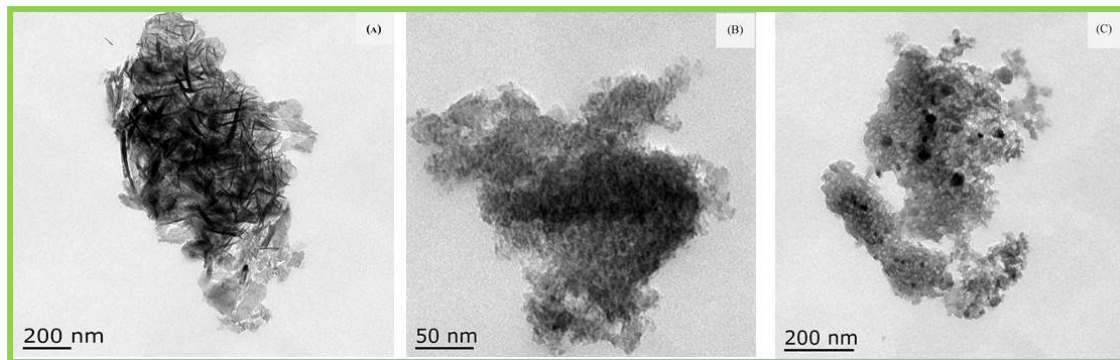

Fig. S5. TEM of BC (A), H-Al/BC (B) and H-Cu-Al/BC (C)

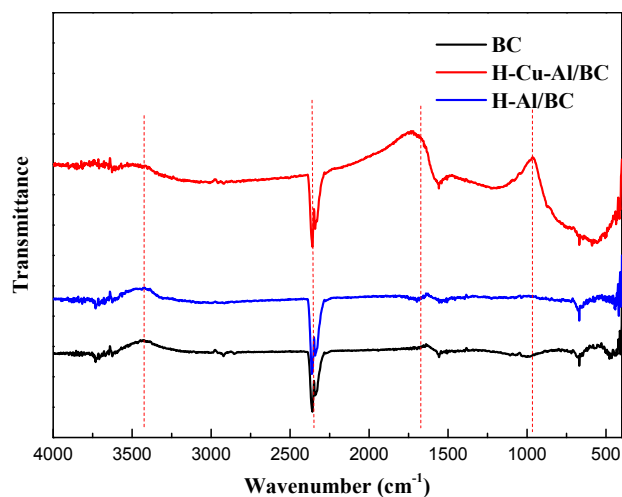

Fig. S6. FTIR spectra of as-prepared samples

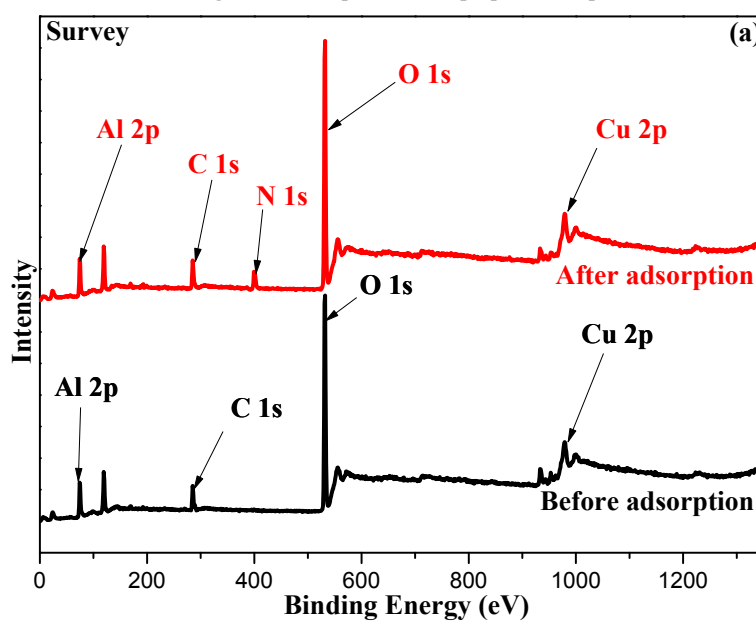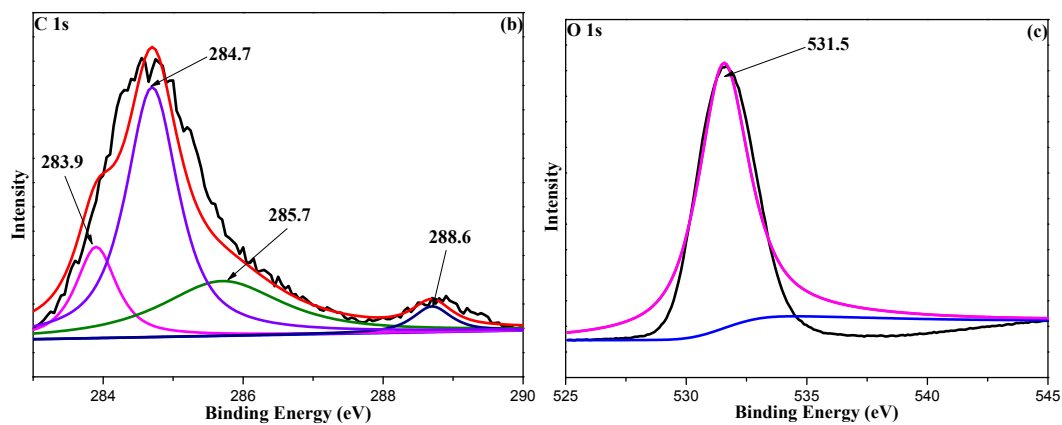

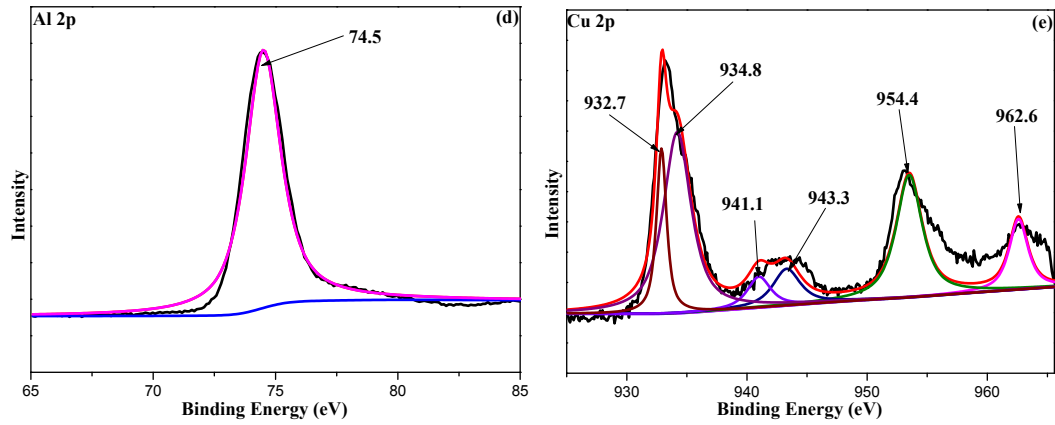

Fig.S7 XPS spectra of H-Cu-Al/BC: (a) survey scan, (b) C 1s, (c) O 1s, (d) Al 2p, (e) Cu 2p.

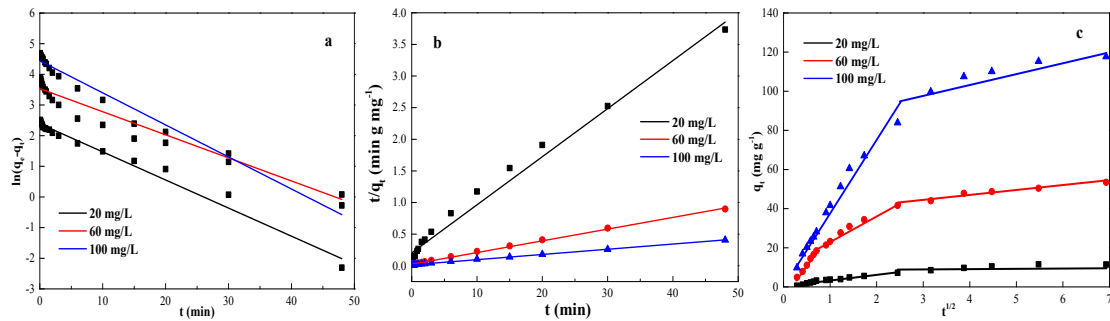

Fig.S8. Adsorption kinetics of  $\text{NH}_4^+\text{-N}$  onto the H-Cu-Al/BC (a) Pseudo-first order kinetics; (b) Pseudo-second order kinetics; (c) and intraparticle diffusion

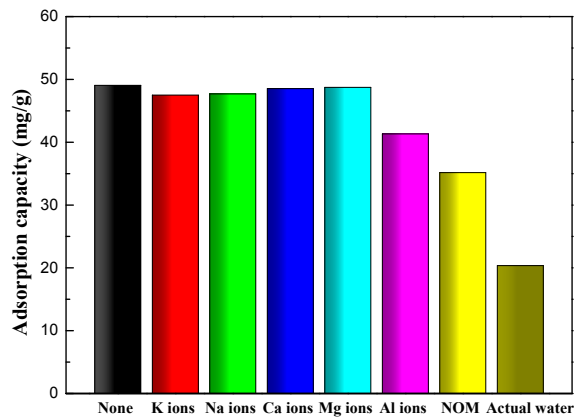

Fig. S9. Effect of co-anions and NOM on the adsorption process

Table 1S The pore textural characteristics of all prepared samples

| Samples    | $S_{\text{BET}}$ ( $\text{m}^2/\text{g}$ ) | $V_{\text{T}}$ ( $\text{m}^3/\text{g}$ ) | $V_{\text{mes}}$ ( $\text{cm}^3/\text{g}$ ) | $D_{\text{p}}$ (nm) | HF ( $V_{\text{mes}}/V_{\text{T}}$ ) |
|------------|--------------------------------------------|------------------------------------------|---------------------------------------------|---------------------|--------------------------------------|
| BC         | 175.4                                      | 0.15                                     | 0.08                                        | 5.04                | 0.53                                 |
| H-Al/BC    | 226.7                                      | 0.27                                     | 0.19                                        | 4.74                | 0.70                                 |
| H-Cu-Al/BC | 302.3                                      | 0.24                                     | 0.16                                        | 3.94                | 0.63                                 |

$S_{\text{BET}}$ =BET surface area;  $V_{\text{T}}$ =total pore volume;  $D_{\text{p}}$ =average pore diameter.

Table 2S Isotherms parameters and correlation coefficients of  $\text{NH}_4^+\text{-N}$  onto the as-prepared materials

| Adsorbent  | Adsorption isotherms     |                          |                |                          |      |                |        |             |                |
|------------|--------------------------|--------------------------|----------------|--------------------------|------|----------------|--------|-------------|----------------|
|            | Langmuir                 |                          |                | Freundlich               |      |                | Temkin |             |                |
|            | Q <sub>m</sub><br>(mg/g) | K <sub>L</sub><br>(L/mg) | R <sup>2</sup> | K <sub>F</sub><br>(mg/g) | n    | R <sup>2</sup> | B      | A<br>(L/mg) | R <sup>2</sup> |
| BC         | 15.46                    | 0.021                    | 0.998          | 18.5                     | 11.4 | 0.873          | 0.38   | 21.4        | 0.991          |
| H-Al/BC    | 37.65                    | 0.037                    | 0.999          | 47.4                     | 17.5 | 0.914          | 0.54   | 54.8        | 0.936          |
| H-Cu-Al/BC | 81.54                    | 0.045                    | 0.999          | 101.7                    | 11.3 | 0.878          | 0.77   | 114.5       | 0.918          |

**Table 3S** Kinetic parameters for NH<sub>4</sub><sup>+</sup>-N adsorption onto the H-Cu-Al/BC

| Concentration<br>(mg/L) | pseudo-first order |                |                | pseudo-second order                          |                |                | intraparticle diffusion |                |                |
|-------------------------|--------------------|----------------|----------------|----------------------------------------------|----------------|----------------|-------------------------|----------------|----------------|
|                         | q <sub>e</sub>     | k <sub>1</sub> | R <sup>2</sup> | 1/k <sub>2</sub> q <sub>e</sub> <sup>2</sup> | q <sub>e</sub> | R <sup>2</sup> | C                       | k <sub>p</sub> | R <sup>2</sup> |
| 20                      | 25.24              | 0.0775         | 0.9806         | 0.2038                                       | 13.15          | 0.9909         | 1.5405                  | 1.8445         | 0.9493         |
| 60                      | 62.07              | 0.0829         | 0.86           | 0.0235                                       | 54.05          | 0.9989         | 13.706                  | 7.0618         | 0.8115         |
| 100                     | 88.49              | 0.1189         | 0.9703         | 0.0142                                       | 121.95         | 0.9988         | 21.626                  | 17.15          | 0.868          |

**Table 4S.** Characteristics of individual substance or the simulated actual water

| Parameters Pollutant            | Mixed concentration | Individual concentration | Standard deviation |
|---------------------------------|---------------------|--------------------------|--------------------|
|                                 | (mg/L)              | (mg/L)                   | (mg/L)             |
| NH <sub>4</sub> <sup>+</sup> -N | 40~50 mg/L          | 40~50 mg/L               | 5~6 mg/L           |
| NOM (Humic acid)                | 10~20 mg/L          | 40~50 mg/L               | 2~3 mg/L           |
| K <sup>+</sup> ions             | 10~20 mg/L          | 40~50 mg/L               | 2~3 mg/L           |
| Na <sup>+</sup> ions            | 10~20 mg/L          | 40~50 mg/L               | 2~3 mg/L           |
| Ca <sup>2+</sup> ions           | 10~20 mg/L          | 40~50 mg/L               | 2~3 mg/L           |
| Mg <sup>2+</sup> ions           | 10~20 mg/L          | 40~50 mg/L               | 2~3 mg/L           |
| Al <sup>3+</sup> ions           | 10~20 mg/L          | 40~50 mg/L               | 2~3 mg/L           |
